# Supplementary material
Source: PubMed Central journal article supplement (PMC2936610)
Supplement: 1010383107_pnas.201010383SI.pdf [file 1010383107_pnas.201010383SI.pdf]

# Supporting Information

Lemos et al. 10.1073/pnas.1010383107

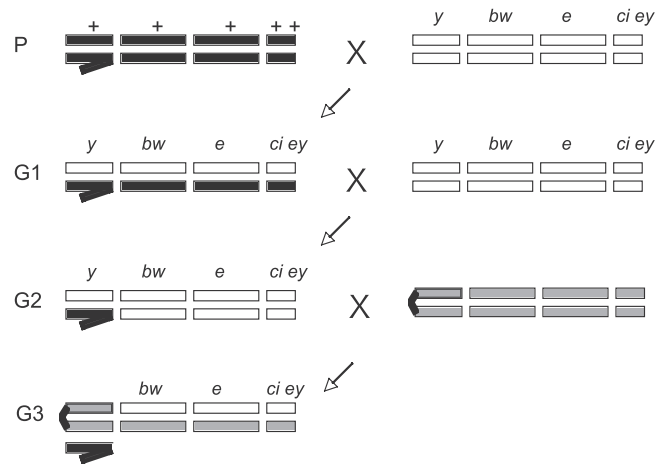

**Fig. S1.** Crossing scheme for obtaining population-specific Y chromosome substitution lines. This was done independently for each Y chromosome lineage to be introgressed such that males from generation G2 have different Y chromosomes introgressed into a common isogenic background. XXY females from generation (G3) also have different Y chromosomes in a background of attached X chromosomes and autosomes that is identical across lineages.

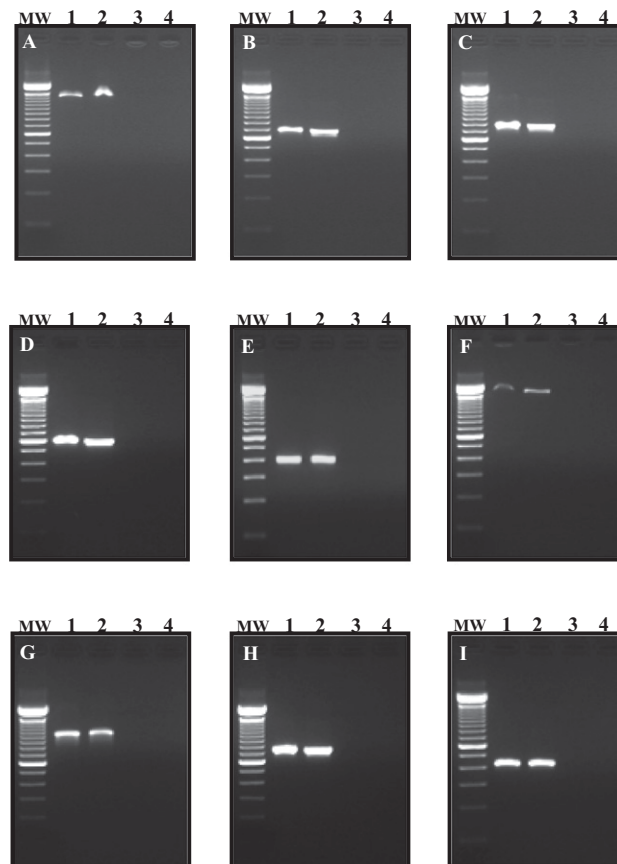

**Fig. S2.** Protein-coding Y-linked genes are not expressed in XXY females. RT-PCR was performed to detect the transcription of Y-linked genes in XY males and XXY females. Lane 1: *Y[Ohio]*. Lane 2: *Y[Congo]*. Lane 3: *XXY[Ohio]*. Lane 4: *XXY[Congo]*. (A–C) *kl-2* gene. (D–F) *kl-3* gene. (G–I) *kl-5* gene. MW, 100-bp DNA ladder (Invitrogen).

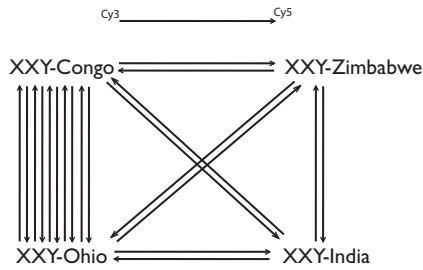

**Fig. S3.** Experimental design for collecting genome-wide gene expression data across XXY female genotypes. Each line denotes two hybridization reactions with Cy3 and Cy5 dyes swapped, for a total of 20 hybridizations.

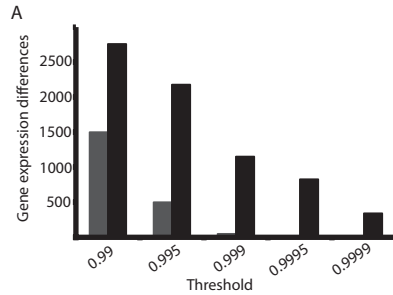

**Fig. S4.** Widespread effect of polymorphic Y chromosomes in XXY female genotypes of *Drosophila*. Number of statistically significant gene expression differences between XXY[Congo] and XXY[Ohio] females (black bars) as a function of the Bayesian posterior probability of differential expression. Gray bars indicate the estimated number of genes expected by chance after permutation of the data.

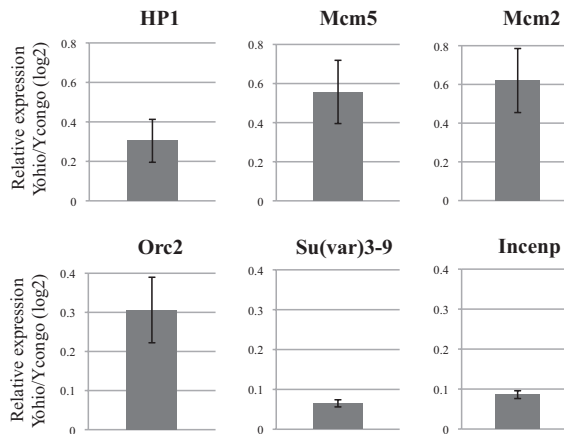

**Fig. S5.** Chromatin-associated proteins are differentially expressed between Y[Congo] and Y[Ohio] males. Ratios of Y[Ohio] and Y[Congo] expression obtained with quantitative real-time PCR are shown.

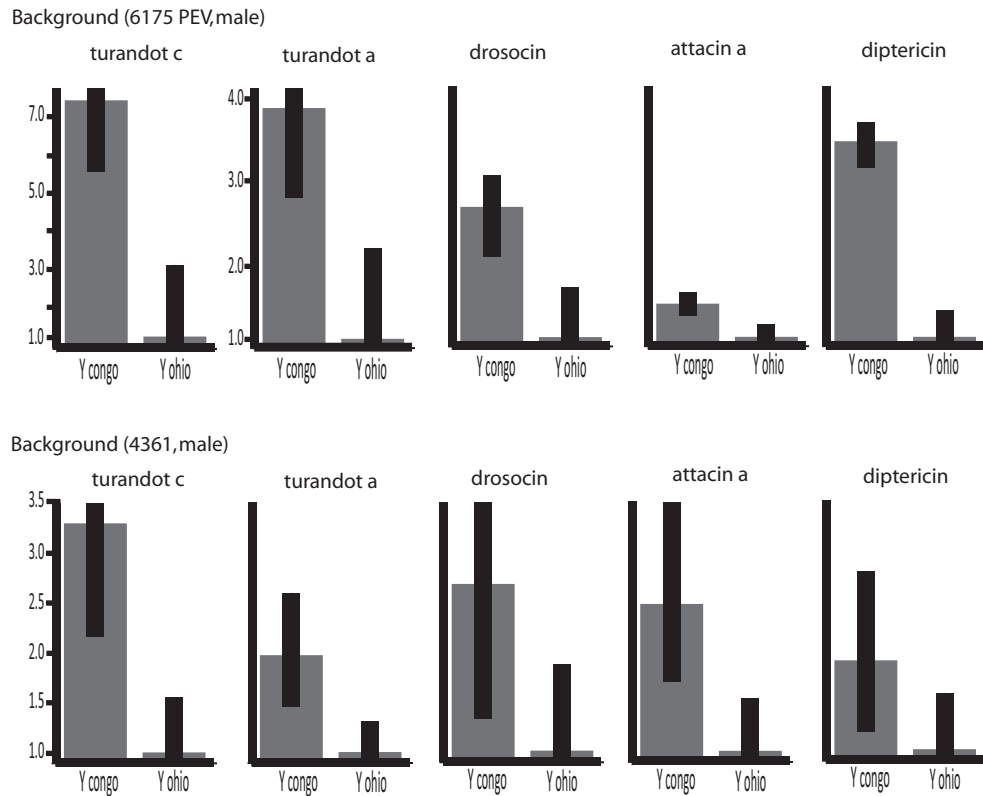

**Fig. S6.** Examples of immune response genes expressed more highly in *Y[Congo]* males relative to *Y[Ohio]* males in two different backgrounds of autosomes and the X chromosome. Background 4361 is the same inbred background used in the Y chromosome substitution lines reported by Lemos et al. (1). Background 6175 results from the cross of males from the Y-chromosome substitution lines in the 4361 background with females carrying the PEV marker *w[m4h]*.

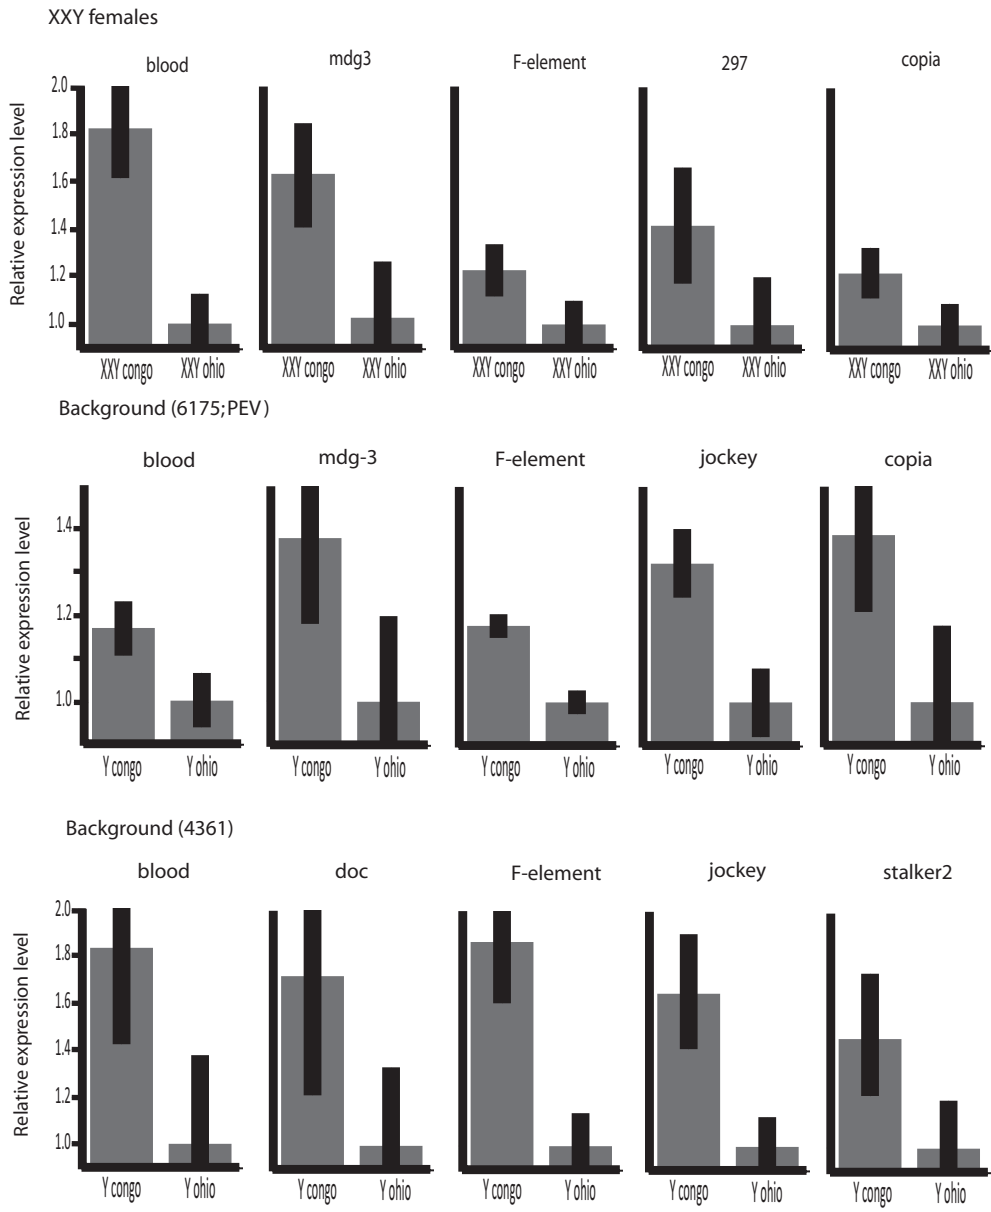

**Fig. S7.** Examples of transposable elements more highly expressed *Y[Congo]* relative to *Y[Ohio]* in XXY females and in two different male backgrounds of autosomes and the X chromosome. Background 4361 is the same inbred background used in the Y chromosome substitution lines reported by Lemos et al. (1). Background 6175 results from the cross of males from the Y chromosome substitution lines in the 4361 background with females carrying the PEV marker *w[m4h]*.

1. Lemos B, Araripe LO, Hartl DL (2008) Polymorphic Y chromosomes harbor cryptic variation with manifold functional consequences. *Science* 319:91–93.

**Table S1. Variation in eye pigmentation in stocks carrying the X chromosome PEV marker *w[m4h]* and Y chromosomes sampled from diverse localities worldwide**

| Strain                              | Mean   | SEM    |
|-------------------------------------|--------|--------|
| <i>Y[Zimbabwe]</i>                  | NA     | NA     |
| <i>Y[Congo-1]</i>                   | 0.0563 | 0.0052 |
| <i>Y[Bogota, Colombia]</i>          | 0.0940 | 0.0073 |
| <i>Y[Connecticut, USA]</i>          | 0.1087 | 0.0056 |
| <i>Y[Cape Town, South Africa]</i>   | 0.1200 | 0.0061 |
| <i>Y[Arizona, USA]</i>              | 0.1270 | 0.0101 |
| <i>Y[Athens, Greece]</i>            | 0.1310 | 0.0090 |
| <i>Y[LE Reduit, Mauritius]</i>      | 0.1470 | 0.0082 |
| <i>Y[Congo-k]</i>                   | 0.1605 | 0.0314 |
| <i>Y[Mumbai, India]</i>             | 0.1707 | 0.0153 |
| <i>Y[Kuala Lumpur, Malaysia]</i>    | 0.1755 | 0.0049 |
| <i>Y[Massachusetts, USA]</i>        | 0.1898 | 0.0199 |
| <i>Y[Ohio, USA]</i>                 | 0.1934 | 0.0077 |
| <i>Y[Captain Cook, Hawaii, USA]</i> | 0.2057 | 0.0415 |
| <i>Y[Congo-11]</i>                  | 0.2473 | 0.0126 |
| <i>Y[Congo-10]</i>                  | 0.2625 | 0.0192 |
| <i>Y[Congo-4]</i>                   | 0.3103 | 0.0030 |

Eye pigmentation was assessed by spectrophotometric analysis at an optical density of 480 nm.

**Table S2. Number of genes up-regulated and down-regulated in *Y[congo]* relative to *Y[Ohio]* in XXY females across four Gene Ontology categories and a range of significance thresholds for differential expression**

|                               | Up-regulated in<br><i>Y[Congo]</i> | Down-regulated in<br><i>Y[Congo]</i> | Percent down-regulated<br>in <i>Y[Congo]</i> | Percent up-regulated<br>in <i>Y[Congo]</i> |
|-------------------------------|------------------------------------|--------------------------------------|----------------------------------------------|--------------------------------------------|
| Chromatin silencing           |                                    |                                      |                                              |                                            |
| <i>P</i> < 0.01               | 7                                  | 94                                   | 93%                                          |                                            |
| <i>P</i> < 0.005              | 5                                  | 71                                   | 93%                                          |                                            |
| <i>P</i> < 0.001              | 3                                  | 34                                   | 92%                                          |                                            |
| Mitochondrion                 |                                    |                                      |                                              |                                            |
| <i>P</i> < 0.01               | 65                                 | 28                                   |                                              | 70%                                        |
| <i>P</i> < 0.005              | 49                                 | 16                                   |                                              | 75%                                        |
| <i>P</i> < 0.001              | 29                                 | 8                                    |                                              | 78%                                        |
| Electron transport            |                                    |                                      |                                              |                                            |
| <i>P</i> < 0.01               | 51                                 | 14                                   |                                              | 78%                                        |
| <i>P</i> < 0.005              | 38                                 | 11                                   |                                              | 78%                                        |
| <i>P</i> < 0.001              | 23                                 | 6                                    |                                              | 79%                                        |
| Defense response and Immunity |                                    |                                      |                                              |                                            |
| <i>P</i> < 0.01               | 43                                 | 9                                    |                                              | 83%                                        |
| <i>P</i> < 0.005              | 38                                 | 7                                    |                                              | 84%                                        |
| <i>P</i> < 0.001              | 31                                 | 2                                    |                                              | 93%                                        |

The excess of down-regulated genes in *Y[Congo]* belonging to the chromatin-silencing class is statistically significant (*P* < 0.01; Fisher's exact test). The excess of up-regulated genes in *Y[Congo]* localized to the mitochondrion, involved in electron transport, or associated with defense response and immunity is also statistically significant (*P* < 0.01, Fisher's exact test).
